# Supplementary material
Source: PubMed Central journal article supplement (PMC7062210)
Supplement: ASN.2019030274SupplementaryData.pdf [file ASN.2019030274SupplementaryData.pdf]

## **SUPPLEMENTAL MATERIAL TABLE OF CONTENTS**

1. Supplemental Figure 1. Cohort creation.
2. Supplemental Table 1. Mean number of days to transition off central venous catheter (CVC) stratified by the presence or absence of a maturing AVF or AVG at the time of hemodialysis (HD) initiation.
3. Supplemental Table 2. Complete competing risks regression model reporting all covariates.
4. Supplemental Table 3a & 3b. Competing risks regression model for transition from central venous catheter (CVC) to death among the study population.

**Supplemental Figure 1. Cohort creation.**

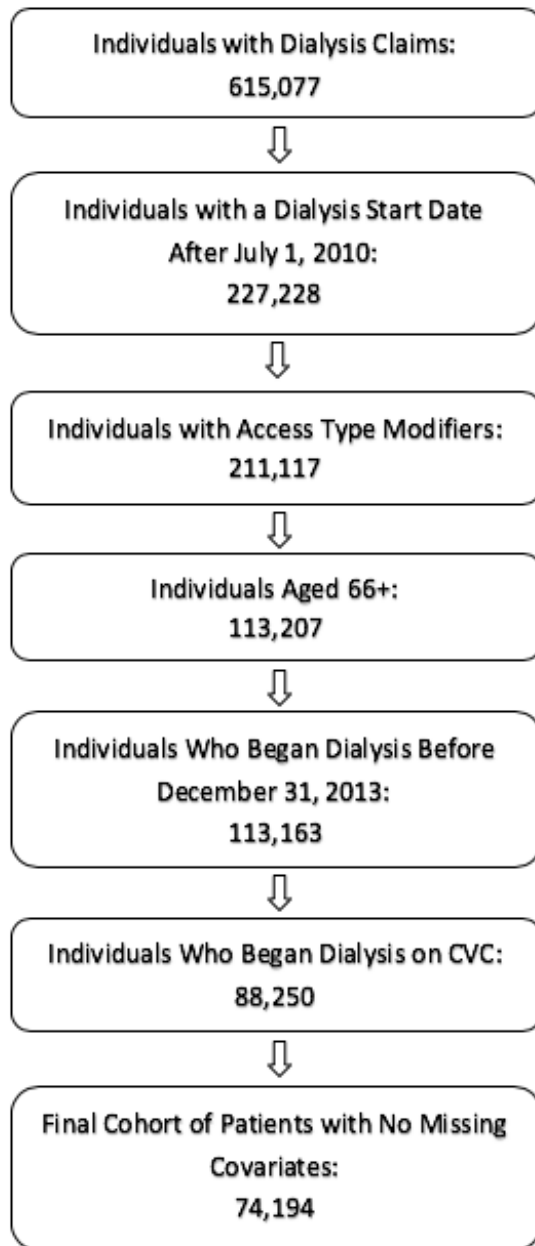

**Supplemental Table 1. Mean and median number of days to transition off central venous catheter (CVC) stratified by the presence or absence of a maturing AVF or AVG at the time of hemodialysis (HD) initiation.**

| <b>Category</b> | <b>Access Status at HD Initiation</b> | <b>N</b> | <b>Mean Days on CVC</b> | <b>Std Dev</b> | <b>Median Days on CVC</b> |
|-----------------|---------------------------------------|----------|-------------------------|----------------|---------------------------|
| White           | No maturing access                    | 36671    | 213.9                   | 209.4          | 154                       |
|                 | AVF maturing                          | 10235    | 196.2                   | 217.4          | 122                       |
|                 | AVG maturing                          | 1268     | 179.2                   | 217.3          | 95                        |
| Black           | No maturing access                    | 10940    | 246.8                   | 229.9          | 177                       |
|                 | AVF maturing                          | 3227     | 235.6                   | 250.2          | 143                       |
|                 | AVG maturing                          | 728.     | 222.7                   | 252.2          | 114                       |
| Hispanic        | No maturing access                    | 5539     | 240.3                   | 220.4          | 176                       |
|                 | AVF maturing                          | 1581     | 233.0                   | 249.4          | 142                       |
|                 | AVG maturing                          | 240      | 203.1                   | 246.4          | 106                       |
| Other Race      | No maturing access                    | 2672     | 237.3                   | 224.2          | 171                       |
|                 | AVF maturing                          | 929      | 220.8                   | 246.4          | 134                       |
|                 | AVG maturing                          | 164      | 199.5                   | 266.8          | 93                        |
| Male            | No maturing access                    | 29186    | 215.7                   | 210.2          | 156                       |
|                 | AVF maturing                          | 8864     | 200.5                   | 226.8          | 121                       |
|                 | AVG maturing                          | 1082     | 189.3                   | 223.5          | 102                       |
| Female          | No maturing access                    | 26636    | 233.4                   | 221.5          | 168                       |
|                 | AVF maturing                          | 7108     | 220.2                   | 233.5          | 138                       |
|                 | AVG maturing                          | 1318     | 201.8                   | 244.9          | 100                       |
| Overall         | No maturing access                    | 55822    | 224.1                   | 215.8          | 162                       |
|                 | AVF maturing                          | 15972    | 209.3                   | 230.0          | 128                       |
|                 | AVG maturing                          | 2400     | 196.2                   | 235.5          | 100                       |

**Supplemental Table 2. Complete competing risks models reporting all covariates.**

| Parameter                                            | Overall |         |       |         |                  |         | Male    |         |       |         |                  |         | Female  |         |       |         |                  |         |
|------------------------------------------------------|---------|---------|-------|---------|------------------|---------|---------|---------|-------|---------|------------------|---------|---------|---------|-------|---------|------------------|---------|
|                                                      | Fistula |         | Graft |         | Fistula or Graft |         | Fistula |         | Graft |         | Fistula or Graft |         | Fistula |         | Graft |         | Fistula or Graft |         |
|                                                      | HR      | P-value | HR    | P-value | HR               | P-value | HR      | P-value | HR    | P-value | HR               | P-value | HR      | P-value | HR    | P-value | HR               | P-value |
| <b>Race (Reference: White)</b>                       |         |         |       |         |                  |         |         |         |       |         |                  |         |         |         |       |         |                  |         |
| Black                                                | 0.88    | <0.01   | 1.80  | <0.01   | 1.13             | <0.01   | 0.88    | <0.01   | 1.97  | <0.01   | 1.10             | <0.01   | 0.89    | <0.01   | 1.69  | <0.01   | 1.16             | <0.01   |
| Hispanic                                             | 1.17    | <0.01   | 1.06  | 0.19    | 1.15             | <0.01   | 1.17    | <0.01   | 1.01  | 0.85    | 1.14             | <0.01   | 1.17    | <0.01   | 1.09  | 0.13    | 1.16             | <0.01   |
| Other Race                                           | 1.23    | <0.01   | 1.39  | <0.01   | 1.33             | <0.01   | 1.18    | <0.01   | 1.61  | <0.01   | 1.32             | <0.01   | 1.29    | <0.01   | 1.25  | 0.00    | 1.34             | <0.01   |
| <b>Female (Reference: Male)</b>                      | 0.81    | <0.01   | 1.48  | <0.01   | 0.96             | <0.01   |         |         |       |         |                  |         |         |         |       |         |                  |         |
| <b>BMI (Reference: Normal)</b>                       |         |         |       |         |                  |         |         |         |       |         |                  |         |         |         |       |         |                  |         |
| Underweight                                          | 0.84    | <0.01   | 1.00  | 0.98    | 0.88             | <0.01   | 0.85    | 0.00    | 1.07  | 0.41    | 0.89             | 0.00    | 0.84    | 0.00    | 0.99  | 0.85    | 0.87             | 0.00    |
| Overweight                                           | 1.10    | <0.01   | 0.97  | 0.21    | 1.07             | <0.01   | 1.12    | <0.01   | 0.89  | 0.00    | 1.06             | 0.00    | 1.08    | 0.00    | 1.05  | 0.18    | 1.08             | 0.00    |
| Obese                                                | 1.17    | <0.01   | 0.95  | 0.04    | 1.11             | <0.01   | 1.19    | <0.01   | 0.87  | 0.00    | 1.12             | <0.01   | 1.13    | <0.01   | 1.01  | 0.87    | 1.10             | <0.01   |
| <b>Age (Reference: 66-70)</b>                        |         |         |       |         |                  |         |         |         |       |         |                  |         |         |         |       |         |                  |         |
| Age 71-75                                            | 0.96    | 0.01    | 1.06  | 0.05    | 0.99             | 0.38    | 0.97    | 0.11    | 1.10  | 0.04    | 1.00             | 0.89    | 0.95    | 0.03    | 1.04  | 0.31    | 0.97             | 0.22    |
| Age 76-80                                            | 0.91    | <0.01   | 1.13  | <0.01   | 0.97             | 0.03    | 0.92    | 0.00    | 1.21  | 0.00    | 0.98             | 0.34    | 0.89    | <0.01   | 1.10  | 0.03    | 0.95             | 0.03    |
| Age 81+                                              | 0.77    | <0.01   | 1.15  | <0.01   | 0.86             | <0.01   | 0.78    | <0.01   | 1.35  | <0.01   | 0.89             | <0.01   | 0.76    | <0.01   | 1.04  | 0.38    | 0.83             | <0.01   |
| <b>Peripheral Vascular Disease (Reference: No)</b>   | 0.94    | 0.00    | 1.04  | 0.24    | 0.96             | 0.00    | 0.95    | 0.01    | 1.08  | 0.09    | 0.97             | 0.15    | 0.93    | 0.01    | 1.01  | 0.86    | 0.94             | 0.01    |
| <b>Atherosclerotic Heart Disease (Reference: No)</b> | 1.02    | 0.23    | 0.98  | 0.39    | 1.01             | 0.48    | 1.03    | 0.20    | 0.97  | 0.38    | 1.01             | 0.43    | 1.01    | 0.68    | 0.99  | 0.75    | 1.00             | 0.88    |
| <b>Congestive Heart Failure (Reference: No)</b>      | 0.91    | <0.01   | 0.96  | 0.10    | 0.91             | <0.01   | 0.91    | <0.01   | 0.95  | 0.15    | 0.91             | <0.01   | 0.92    | <0.01   | 0.97  | 0.36    | 0.92             | <0.01   |
| <b>Other Cardiac Disease (Reference: No)</b>         | 0.93    | <0.01   | 0.98  | 0.34    | 0.93             | <0.01   | 0.93    | <0.01   | 0.99  | 0.73    | 0.93             | <0.01   | 0.94    | 0.00    | 0.97  | 0.39    | 0.94             | 0.00    |

|                                                                       |      |       |      |       |      |       |      |       |      |       |      |       |      |       |      |       |      |       |
|-----------------------------------------------------------------------|------|-------|------|-------|------|-------|------|-------|------|-------|------|-------|------|-------|------|-------|------|-------|
| <b>Diabetes<br/>(Reference: No)</b>                                   | 1.06 | <0.01 | 1.04 | 0.07  | 1.07 | <0.01 | 1.04 | 0.01  | 1.03 | 0.48  | 1.05 | 0.00  | 1.09 | <0.01 | 1.05 | 0.08  | 1.10 | <0.01 |
| <b>Serum Creatinine<br/>(Reference:<br/>Normal)</b>                   | 0.99 | 0.01  | 1.00 | 0.21  | 0.99 | 0.01  | 0.98 | 0.00  | 1.01 | 0.30  | 0.99 | 0.01  | 0.99 | 0.22  | 1.00 | 0.91  | 0.99 | 0.11  |
| <b>Glomerular<br/>Filtration Rate<br/>(Reference:<br/>Normal)</b>     | 0.98 | <0.01 | 0.99 | 0.00  | 0.98 | <0.01 | 0.97 | <0.01 | 1.00 | 0.31  | 0.98 | <0.01 | 0.99 | <0.01 | 0.99 | 0.00  | 0.99 | <0.01 |
| <b>Needs Assistance<br/>With ADLs<br/>(Reference: No)</b>             | 0.80 | <0.01 | 0.99 | 0.72  | 0.84 | <0.01 | 0.78 | <0.01 | 0.95 | 0.08  | 0.80 | <0.01 | 0.83 | <0.01 | 1.01 | 0.81  | 0.87 | <0.01 |
| <b>Hospitalized in the<br/>Past Year<br/>(Reference: No)</b>          | 0.92 | <0.01 | 1.05 | 0.03  | 0.94 | <0.01 | 0.95 | 0.00  | 1.04 | 0.01  | 0.96 | 0.00  | 0.89 | <0.01 | 1.06 | 0.07  | 0.93 | <0.01 |
| <b>Institutionalized<br/>(Reference: No)</b>                          | 0.67 | <0.01 | 0.91 | 0.00  | 0.70 | <0.01 | 0.68 | <0.01 | 0.91 | 0.87  | 0.70 | <0.01 | 0.65 | <0.01 | 0.90 | 0.02  | 0.70 | <0.01 |
| <b>Received Pre-<br/>ESRD Nephrology<br/>Care (Reference:<br/>No)</b> | 1.31 | <0.01 | 1.17 | <0.01 | 1.34 | <0.01 | 1.31 | <0.01 | 1.16 | 0.00  | 1.33 | <0.01 | 1.32 | <0.01 | 1.18 | <0.01 | 1.34 | <0.01 |
| <b>Income<br/>(Reference:<br/>Highest, Quartile<br/>4)</b>            |      |       |      |       |      |       |      |       |      |       |      |       |      |       |      |       |      |       |
| (Lowest Income)<br>Quartile 1                                         | 0.95 | 0.01  | 0.98 | 0.55  | 0.95 | 0.00  | 0.93 | 0.01  | 1.02 | 0.77  | 0.94 | 0.01  | 0.96 | 0.19  | 0.96 | 0.40  | 0.95 | 0.03  |
| Quartile 2                                                            | 0.99 | 0.58  | 0.96 | 0.26  | 0.98 | 0.12  | 1.02 | 0.41  | 0.88 | 0.01  | 0.98 | 0.33  | 0.95 | 0.07  | 1.03 | 0.55  | 0.97 | 0.20  |
| Quartile 3                                                            | 0.99 | 0.68  | 0.97 | 0.36  | 0.98 | 0.24  | 1.00 | 0.97  | 0.96 | 0.36  | 0.99 | 0.48  | 0.98 | 0.42  | 0.98 | 0.69  | 0.98 | 0.30  |
| <b>Medicaid<br/>(Reference: No)</b>                                   | 1.01 | 0.37  | 1.10 | 0.00  | 1.05 | 0.00  | 1.05 | 0.04  | 1.12 | 0.01  | 1.08 | 0.00  | 0.98 | 0.43  | 1.09 | 0.01  | 1.02 | 0.23  |
| <b>USRDS Network<br/>(Reference: 18)</b>                              |      |       |      |       |      |       |      |       |      |       |      |       |      |       |      |       |      |       |
|                                                                       | 1.09 | 0.03  | 0.88 | 0.07  | 1.03 | 0.36  | 1.08 | 0.15  | 0.89 | 0.29  | 1.03 | 0.50  | 1.16 | 0.02  | 0.81 | 0.04  | 1.04 | 0.41  |
|                                                                       | 1.00 | 0.96  | 0.76 | <0.01 | 0.90 | 0.00  | 1.02 | 0.59  | 0.70 | <0.01 | 0.92 | 0.04  | 1.00 | 0.99  | 0.78 | 0.00  | 0.90 | 0.01  |
|                                                                       | 1.02 | 0.59  | 0.93 | 0.28  | 0.99 | 0.78  | 1.08 | 0.09  | 0.85 | 0.08  | 1.02 | 0.64  | 0.98 | 0.77  | 0.97 | 0.68  | 0.97 | 0.52  |
|                                                                       | 0.94 | 0.09  | 1.01 | 0.91  | 0.95 | 0.12  | 0.96 | 0.45  | 0.91 | 0.32  | 0.94 | 0.15  | 0.94 | 0.33  | 1.04 | 0.66  | 0.98 | 0.61  |

|                                                    |      |       |      |       |      |       |      |      |      |      |      |      |      |      |      |       |      |      |
|----------------------------------------------------|------|-------|------|-------|------|-------|------|------|------|------|------|------|------|------|------|-------|------|------|
|                                                    | 0.91 | 0.01  | 0.93 | 0.28  | 0.89 | 0.00  | 0.92 | 0.11 | 0.84 | 0.07 | 0.88 | 0.00 | 0.92 | 0.16 | 0.98 | 0.82  | 0.93 | 0.11 |
|                                                    | 1.04 | 0.31  | 1.04 | 0.49  | 1.06 | 0.07  | 1.06 | 0.18 | 0.95 | 0.57 | 1.04 | 0.31 | 1.04 | 0.49 | 1.07 | 0.38  | 1.08 | 0.08 |
|                                                    | 0.93 | 0.06  | 0.96 | 0.55  | 0.93 | 0.03  | 0.98 | 0.63 | 0.91 | 0.29 | 0.95 | 0.26 | 0.89 | 0.05 | 1.00 | 0.95  | 0.92 | 0.06 |
|                                                    | 1.03 | 0.39  | 1.11 | 0.11  | 1.08 | 0.03  | 1.10 | 0.05 | 1.04 | 0.67 | 1.11 | 0.02 | 1.01 | 0.93 | 1.10 | 0.27  | 1.06 | 0.25 |
|                                                    | 0.98 | 0.61  | 0.99 | 0.86  | 0.98 | 0.46  | 0.98 | 0.71 | 0.98 | 0.78 | 0.98 | 0.55 | 1.02 | 0.75 | 0.96 | 0.59  | 0.99 | 0.85 |
|                                                    | 0.94 | 0.13  | 1.04 | 0.62  | 0.96 | 0.25  | 0.97 | 0.59 | 0.97 | 0.76 | 0.96 | 0.45 | 0.94 | 0.30 | 1.04 | 0.66  | 0.97 | 0.52 |
|                                                    | 1.16 | <0.01 | 0.98 | 0.70  | 1.12 | <0.01 | 1.16 | 0.00 | 0.93 | 0.39 | 1.11 | 0.01 | 1.19 | 0.00 | 0.99 | 0.92  | 1.15 | 0.00 |
|                                                    | 1.09 | 0.03  | 0.97 | 0.72  | 1.07 | 0.06  | 1.12 | 0.03 | 0.90 | 0.35 | 1.08 | 0.13 | 1.09 | 0.17 | 1.00 | 0.99  | 1.07 | 0.19 |
|                                                    | 1.00 | 0.93  | 0.93 | 0.31  | 0.96 | 0.26  | 1.03 | 0.55 | 0.85 | 0.13 | 0.97 | 0.58 | 1.00 | 0.96 | 0.95 | 0.57  | 0.96 | 0.42 |
|                                                    | 1.01 | 0.82  | 1.18 | 0.00  | 1.08 | 0.01  | 1.04 | 0.37 | 1.12 | 0.16 | 1.07 | 0.06 | 1.03 | 0.61 | 1.15 | 0.04  | 1.09 | 0.02 |
|                                                    | 1.06 | 0.16  | 0.87 | 0.06  | 1.00 | 0.92  | 1.11 | 0.05 | 0.80 | 0.06 | 1.03 | 0.57 | 1.02 | 0.72 | 0.89 | 0.27  | 0.98 | 0.70 |
|                                                    | 1.10 | 0.04  | 0.83 | 0.04  | 1.04 | 0.39  | 1.19 | 0.00 | 0.79 | 0.07 | 1.10 | 0.07 | 1.02 | 0.74 | 0.85 | 0.17  | 0.97 | 0.62 |
|                                                    | 1.00 | 0.95  | 1.08 | 0.23  | 1.03 | 0.44  | 1.04 | 0.49 | 0.99 | 0.93 | 1.02 | 0.63 | 0.99 | 0.85 | 1.12 | 0.20  | 1.04 | 0.45 |
| <b>Rurality<br/>(Reference: Most<br/>urban, 1)</b> |      |       |      |       |      |       |      |      |      |      |      |      |      |      |      |       |      |      |
| 2                                                  | 0.97 | 0.11  | 0.92 | 0.00  | 0.94 | <0.01 | 0.97 | 0.20 | 0.93 | 0.13 | 0.95 | 0.01 | 0.98 | 0.39 | 0.90 | 0.01  | 0.93 | 0.00 |
| 3                                                  | 1.02 | 0.42  | 0.90 | 0.01  | 0.98 | 0.34  | 0.99 | 0.68 | 0.92 | 0.17 | 0.97 | 0.19 | 1.06 | 0.08 | 0.88 | 0.02  | 1.00 | 0.95 |
| 4                                                  | 1.02 | 0.56  | 0.96 | 0.41  | 0.99 | 0.73  | 0.99 | 0.87 | 0.95 | 0.46 | 0.97 | 0.41 | 1.04 | 0.30 | 0.97 | 0.64  | 1.01 | 0.74 |
| 5                                                  | 1.07 | 0.23  | 0.82 | 0.08  | 1.00 | 0.95  | 1.04 | 0.60 | 0.61 | 0.01 | 0.93 | 0.34 | 1.11 | 0.21 | 0.96 | 0.75  | 1.07 | 0.35 |
| 6                                                  | 1.01 | 0.55  | 0.90 | 0.01  | 0.97 | 0.17  | 1.00 | 0.96 | 0.88 | 0.04 | 0.96 | 0.16 | 1.04 | 0.28 | 0.91 | 0.06  | 0.99 | 0.70 |
| 7                                                  | 1.05 | 0.10  | 0.71 | <0.01 | 0.93 | 0.00  | 1.00 | 1.00 | 0.71 | 0.00 | 0.91 | 0.02 | 1.13 | 0.01 | 0.70 | <0.01 | 0.94 | 0.13 |
| 8                                                  | 0.99 | 0.72  | 0.95 | 0.34  | 0.97 | 0.29  | 0.94 | 0.17 | 0.97 | 0.71 | 0.94 | 0.11 | 1.06 | 0.25 | 0.92 | 0.31  | 1.01 | 0.84 |
| (Least urban) 9                                    | 0.99 | 0.71  | 0.76 | <0.01 | 0.90 | 0.00  | 0.98 | 0.67 | 0.68 | 0.00 | 0.88 | 0.00 | 0.99 | 0.91 | 0.81 | 0.02  | 0.91 | 0.04 |

Exponentiated coefficients; 95% confidence intervals in brackets.

Covariates included age, race/ethnicity, gender, BMI, peripheral arterial disease, congestive heart failure, atherosclerotic heart disease, other cardiac disease, diabetes, creatinine, GFR, pre-ESRD nephrology care, functional status, hospitalization within the past year, institutionalization, income, USRDS network, rurality, Medicaid enrollment.

GFR and Serum Cr reported as continuous variables, thus the HR is associated with an increase of 1 whole unit (mg/mL) in each of the variables.

Abbreviations: Activities of Daily Living (ADL); Body Mass Index (BMI); End-Stage Renal Disease (ESRD); Glomerular Filtration Rate (GFR); United States Renal Data System (USRDS).

**Supplemental Table 3a & 3b. Selected results of competing risks regression model for transition from central venous catheter (CVC) to death among the study population.**

**Table 3a.**

|                                                                                                                  |                         |
|------------------------------------------------------------------------------------------------------------------|-------------------------|
| Overall                                                                                                          | <b>Death</b>            |
| <i>N</i>                                                                                                         | 74,194                  |
| <b>Race/Ethnicity (Reference: White)</b>                                                                         |                         |
| <b>Black</b>                                                                                                     | 0.71***<br>[0.68,0.74]  |
| <b>Hispanic</b>                                                                                                  | 0.67***<br>[0.65,0.73]  |
| <b>Other Race</b>                                                                                                | 0.54***<br>[0.49,0.58]  |
| <b>Gender (Reference: Male)</b>                                                                                  |                         |
| <b>Female</b>                                                                                                    | 0.94 ***<br>[0.91,0.96] |
| Exponentiated coefficients; 95% confidence intervals in brackets. * $p < 0.05$ , ** $p < 0.01$ , *** $p < 0.001$ |                         |

**Table 3b.**

| Transition to:                           | No Maturing Permanent Access |        |      |      |        |      |         |        |      |       | Maturing Permanent Access |      |        |      |      |        |      |         |        |      |       |        |      |      |
|------------------------------------------|------------------------------|--------|------|------|--------|------|---------|--------|------|-------|---------------------------|------|--------|------|------|--------|------|---------|--------|------|-------|--------|------|------|
|                                          | AVF                          |        |      | AVG  |        |      | AVF/AVF |        |      | DEATH |                           | AVF  |        |      | AVG  |        |      | AVF/AVG |        |      | DEATH |        |      |      |
| Parameter                                | sHR                          | 95% CI |      | sHR  | 95% CI |      | sHR     | 95% CI |      | sHR   | 95% CI                    | sHR  | 95% CI |      | sHR  | 95% CI |      | sHR     | 95% CI |      | sHR   | 95% CI |      |      |
| <b>Race/Ethnicity (Reference: White)</b> |                              |        |      |      |        |      |         |        |      |       |                           |      |        |      |      |        |      |         |        |      |       |        |      |      |
| Black                                    | 0.90                         | 0.86   | 0.93 | 1.82 | 1.71   | 1.94 | 1.17    | 1.13   | 1.22 | 0.72  | 0.69                      | 0.75 | 0.80   | 0.76 | 0.85 | 1.71   | 1.54 | 1.90    | 0.98   | 0.94 | 1.03  | 0.72   | 0.65 | 0.80 |
| Hispanic                                 | 1.28                         | 1.22   | 1.36 | 1.06 | 0.97   | 1.17 | 1.24    | 1.18   | 1.30 | 0.67  | 0.63                      | 0.71 | 0.96   | 0.89 | 1.04 | 1.04   | 0.88 | 1.22    | 0.96   | 0.90 | 1.03  | 0.80   | 0.70 | 0.93 |
| Other Race                               | 1.30                         | 1.21   | 1.39 | 1.39 | 1.25   | 1.56 | 1.38    | 1.30   | 1.47 | 0.55  | 0.50                      | 0.60 | 0.99   | 0.90 | 1.08 | 1.38   | 1.15 | 1.65    | 1.09   | 1.01 | 1.19  | 0.57   | 0.47 | 0.70 |
| <b>Female Gender (Reference: Male)</b>   | 0.80                         | 0.78   | 0.83 | 1.49 | 1.41   | 1.56 | 0.96    | 0.94   | 0.99 | 0.93  | 0.90                      | 0.96 | 0.83   | 0.80 | 0.87 | 1.47   | 1.35 | 1.60    | 0.95   | 0.91 | 0.98  | 0.94   | 0.87 | 1.01 |



|                                                                           |      |      |      |      |      |      |      |      |      |      |      |      |      |      |      |      |      |      |      |      |      |      |      |      |  |
|---------------------------------------------------------------------------|------|------|------|------|------|------|------|------|------|------|------|------|------|------|------|------|------|------|------|------|------|------|------|------|--|
| <b>BMI<br/>(Reference:<br/>Normal)</b>                                    |      |      |      |      |      |      |      |      |      |      |      |      |      |      |      |      |      |      |      |      |      |      |      |      |  |
| underweight                                                               | 0.81 | 0.75 | 0.88 | 0.98 | 0.87 | 1.09 | 0.85 | 0.79 | 0.90 | 1.19 | 1.12 | 1.27 | 0.97 | 0.86 | 1.09 | 1.12 | 0.92 | 1.36 | 1.01 | 0.92 | 1.12 | 1.10 | 0.93 | 1.31 |  |
| overweight                                                                | 1.10 | 1.06 | 1.14 | 0.99 | 0.93 | 1.05 | 1.07 | 1.04 | 1.11 | 0.91 | 0.88 | 0.95 | 1.09 | 1.04 | 1.15 | 0.91 | 0.82 | 1.01 | 1.05 | 1.00 | 1.10 | 0.82 | 0.75 | 0.89 |  |
| obese                                                                     | 1.18 | 1.13 | 1.22 | 0.99 | 0.93 | 1.06 | 1.13 | 1.10 | 1.17 | 0.84 | 0.81 | 0.87 | 1.12 | 1.06 | 1.18 | 0.83 | 0.75 | 0.92 | 1.04 | 0.99 | 1.09 | 0.82 | 0.75 | 0.90 |  |
| <b>Age (Reference:<br/>66-60)</b>                                         |      |      |      |      |      |      |      |      |      |      |      |      |      |      |      |      |      |      |      |      |      |      |      |      |  |
| Age 71-75                                                                 | 0.94 | 0.91 | 0.98 | 1.07 | 0.99 | 1.14 | 0.98 | 0.95 | 1.02 | 1.16 | 1.11 | 1.22 | 0.99 | 0.93 | 1.04 | 1.05 | 0.94 | 1.18 | 1.01 | 0.96 | 1.06 | 1.13 | 1.02 | 1.25 |  |
| Age 76-80                                                                 | 0.88 | 0.85 | 0.92 | 1.15 | 1.07 | 1.24 | 0.96 | 0.92 | 0.99 | 1.28 | 1.23 | 1.34 | 0.97 | 0.92 | 1.03 | 1.10 | 0.97 | 1.23 | 1.00 | 0.95 | 1.06 | 1.23 | 1.11 | 1.37 |  |
| Age 81+                                                                   | 0.75 | 0.72 | 0.78 | 1.13 | 1.06 | 1.21 | 0.85 | 0.82 | 0.88 | 1.56 | 1.49 | 1.62 | 0.88 | 0.83 | 0.94 | 1.22 | 1.09 | 1.38 | 0.97 | 0.92 | 1.02 | 1.52 | 1.37 | 1.68 |  |
| <b>Needs<br/>Assistance With<br/>ADLs<br/>(Reference: No)</b>             | 0.78 | 0.75 | 0.82 | 0.95 | 0.89 | 1.02 | 0.81 | 0.78 | 0.84 | 1.27 | 1.22 | 1.31 | 0.89 | 0.84 | 0.95 | 1.11 | 0.99 | 1.24 | 0.94 | 0.89 | 1.00 | 1.30 | 1.18 | 1.43 |  |
| <b>Hospitalized in<br/>the Past Year<br/>(Reference: No)</b>              | 0.91 | 0.88 | 0.94 | 1.03 | 0.97 | 1.08 | 0.93 | 0.91 | 0.96 | 1.13 | 1.10 | 1.17 | 0.98 | 0.94 | 1.03 | 1.11 | 1.02 | 1.21 | 1.02 | 0.98 | 1.06 | 1.20 | 1.11 | 1.29 |  |
| <b>Institutionalized<br/>(Reference: No)</b>                              | 0.65 | 0.62 | 0.69 | 0.88 | 0.81 | 0.95 | 0.69 | 0.66 | 0.72 | 1.51 | 1.45 | 1.57 | 0.75 | 0.70 | 0.81 | 1.04 | 0.91 | 1.19 | 0.78 | 0.73 | 0.84 | 1.63 | 1.47 | 1.81 |  |
| <b>Received Pre-<br/>ESRD<br/>Nephrology<br/>Care<br/>(Reference: No)</b> | 1.18 | 1.14 | 1.22 | 1.23 | 1.16 | 1.30 | 1.24 | 1.20 | 1.27 | 0.79 | 0.76 | 0.81 | 1.16 | 1.10 | 1.23 | 0.98 | 0.88 | 1.09 | 1.13 | 1.08 | 1.19 | 0.76 | 0.70 | 0.83 |  |

Exponentiated coefficients.

Covariates included age, race/ethnicity, gender, BMI, peripheral arterial disease, congestive heart failure, atherosclerotic heart disease, other cardiac disease, diabetes, creatinine, GFR, pre-ESRD nephrology care, functional status, hospitalization within the past year, institutionalization, income, USRDS network, rurality, Medicaid enrollment.

Abbreviations: Arteriovenous Fistula (AVF); Arteriovenous Graft (AVG); Body Mass Index (BMI); End-Stage Renal Disease (ESRD); United States Renal Data System (USRDS).
